# Supplementary material for: Adjuvant chemotherapy in patients with locally advanced bladder cancer after neoadjuvant chemotherapy and radical cystectomy: a systematic review and pooled analysis
Source: PubMed Central journal article supplement — Transl Androl Urol. 2021 Jan;10(1):283–91. doi: 10.21037/tau-20-571 (PMC7844510; doi:10.21037/tau-20-571), 2021-01
Supplement: tau-10-01-283-supplementary.pdf [file tau-10-01-283-supplementary.pdf]

**Table S1** The Newcastle-Ottawa Scale (NOS) for assessing the quality of cohort studies

| Study (year)                   | Selection                                 |                           |                       |                                                                          | Comparability                                 |                                          | Assessment of outcome |                                                 |                                 | Total quality score |
|--------------------------------|-------------------------------------------|---------------------------|-----------------------|--------------------------------------------------------------------------|-----------------------------------------------|------------------------------------------|-----------------------|-------------------------------------------------|---------------------------------|---------------------|
|                                | Representative-ness of the exposed cohort | Ascertainment of exposure | Selection of Controls | Demonstration that outcome of interest was not present at start of study | Study controls for the most important factors | Study controls for any additional factor | Assessment of outcome | Was follow-up long enough for outcomes to occur | Adequacy of follow up of cohort |                     |
| Wilson Sui (2017)              | *                                         | *                         | *                     | –                                                                        | *                                             | *                                        | *                     | *                                               | –                               | 7                   |
| Thomas Seisen (2017)           | *                                         | *                         | *                     | –                                                                        | *                                             | *                                        | *                     | *                                               | *                               | 8                   |
| William P. Parker (2017)       | *                                         | *                         | *                     | –                                                                        | *                                             | *                                        | *                     | *                                               | *                               | 8                   |
| Nieves Martinez Chanza (2018)  | *                                         | *                         | *                     | –                                                                        | *                                             | *                                        | *                     | *                                               | *                               | 8                   |
| Wassim Kassouf (2009)          | *                                         | *                         | *                     | –                                                                        | *                                             | *                                        | *                     | *                                               | –                               | 7                   |
| Kamran Zargar-Shoshtari (2016) | *                                         | *                         | *                     | –                                                                        | *                                             | *                                        | *                     | *                                               | –                               | 7                   |
